# Supplementary material
Source: publisher site journal article supplement (https://www.dovepress.com/get_supplementary_file.php?f=472748.docx)
Supplement: Supplementary file 1 [file get_supplementary_file.php]

Supplementary Figure 1 Funnel plot of studies included in the meta-analysis on insufficient sleep and prevalence of myopia in children.


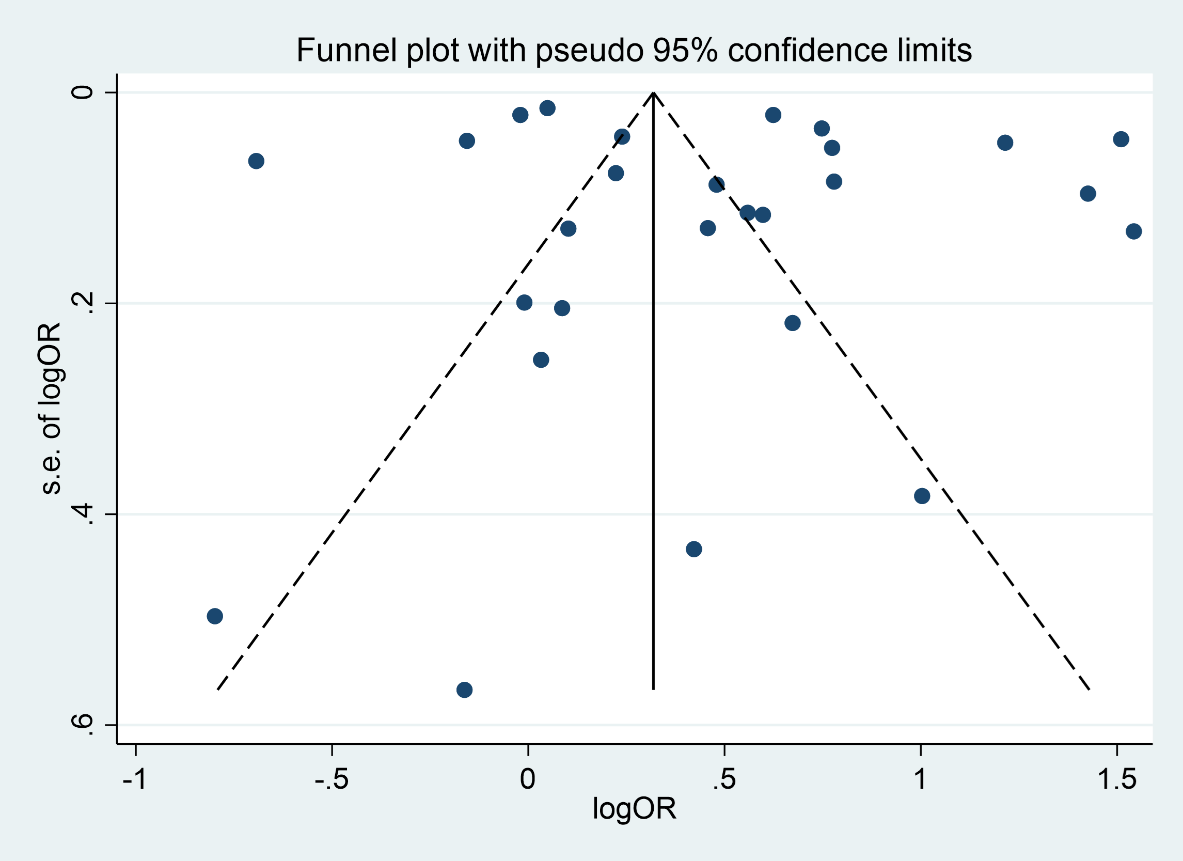


Supplementary Figure 2 Sensitivity analysis of studies included in the meta-analysis on insufficient sleep and prevalence of myopia in children.


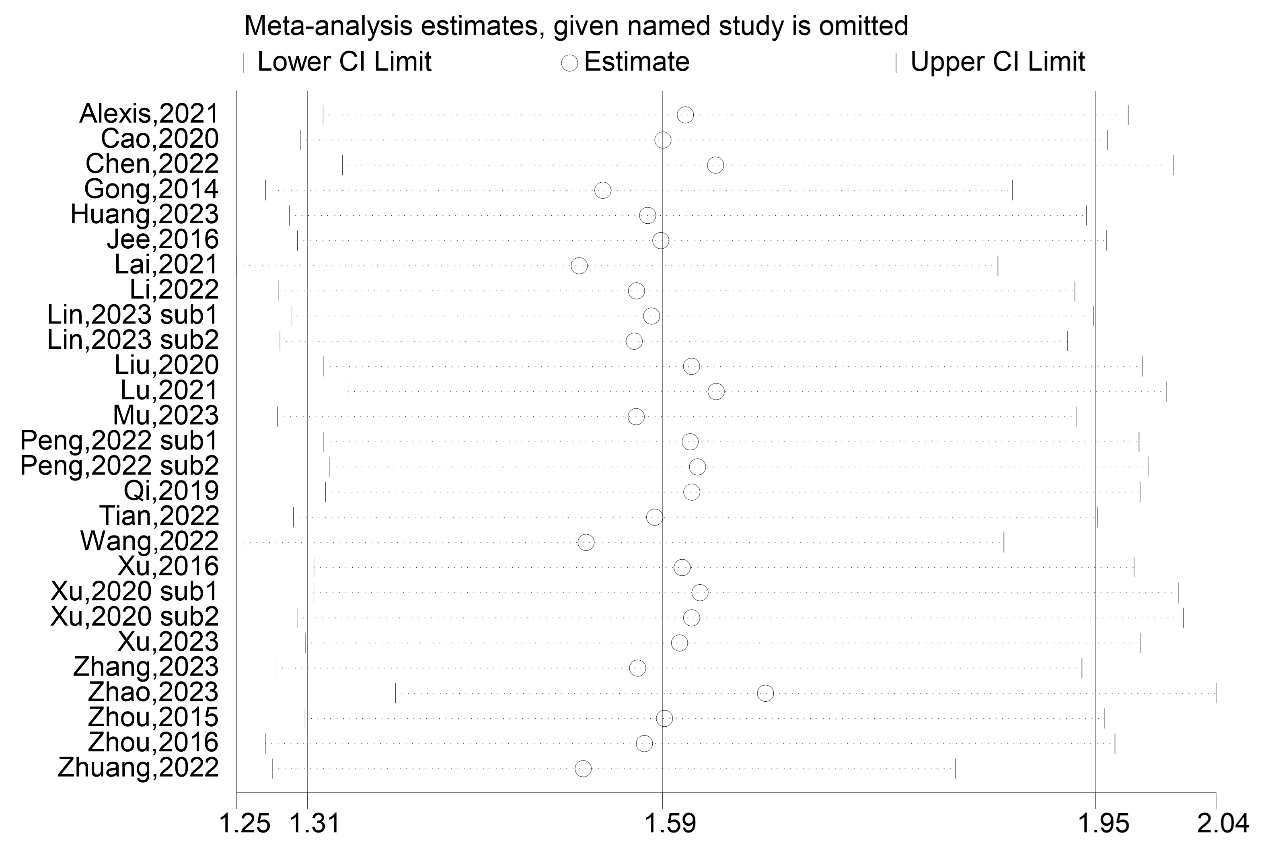


Supplementary Table 1 PRISMA checklist of the present study.

| **Section and Topic** | **Item #** | **Checklist item** | **Location where item is reported** |
| --- | --- | --- | --- |
| **TITLE** | | |  |
| Title | 1 | Identify the report as a systematic review. | Page 1 |
| **ABSTRACT** | | |  |
| Abstract | 2 | See the PRISMA 2020 for Abstracts checklist. | Page2 |
| **INTRODUCTION** | | |  |
| Rationale | 3 | Describe the rationale for the review in the context of existing knowledge. | Page3 |
| Objectives | 4 | Provide an explicit statement of the objective(s) or question(s) the review addresses. | Page3 |
| **METHODS** | | |  |
| Eligibility criteria | 5 | Specify the inclusion and exclusion criteria for the review and how studies were grouped for the syntheses. | Page4 |
| Information sources | 6 | Specify all databases, registers, websites, organisations, reference lists and other sources searched or consulted to identify studies. Specify the date when each source was last searched or consulted. | Page4 |
| Search strategy | 7 | Present the full search strategies for all databases, registers and websites, including any filters and limits used. | Page4 |
| Selection process | 8 | Specify the methods used to decide whether a study met the inclusion criteria of the review, including how many reviewers screened each record and each report retrieved, whether they worked independently, and if applicable, details of automation tools used in the process. | Page4 |
| Data collection process | 9 | Specify the methods used to collect data from reports, including how many reviewers collected data from each report, whether they worked independently, any processes for obtaining or confirming data from study investigators, and if applicable, details of automation tools used in the process. | Page4 |
| Data items | 10a | List and define all outcomes for which data were sought. Specify whether all results that were compatible with each outcome domain in each study were sought (e.g. for all measures, time points, analyses), and if not, the methods used to decide which results to collect. | Page5 |
| 10b | List and define all other variables for which data were sought (e.g. participant and intervention characteristics, funding sources). Describe any assumptions made about any missing or unclear information. | Page5 |
| Study risk of bias assessment | 11 | Specify the methods used to assess risk of bias in the included studies, including details of the tool(s) used, how many reviewers assessed each study and whether they worked independently, and if applicable, details of automation tools used in the process. | Page6 |
| Effect measures | 12 | Specify for each outcome the effect measure(s) (e.g. risk ratio, mean difference) used in the synthesis or presentation of results. | Page7 |
| Synthesis methods | 13a | Describe the processes used to decide which studies were eligible for each synthesis (e.g. tabulating the study intervention characteristics and comparing against the planned groups for each synthesis (item #5)). | Page7 |
| 13b | Describe any methods required to prepare the data for presentation or synthesis, such as handling of missing summary statistics, or data conversions. | Page7 |
| 13c | Describe any methods used to tabulate or visually display results of individual studies and syntheses. | Page7 |
| 13d | Describe any methods used to synthesize results and provide a rationale for the choice(s). If meta-analysis was performed, describe the model(s), method(s) to identify the presence and extent of statistical heterogeneity, and software package(s) used. | Page7 |
| 13e | Describe any methods used to explore possible causes of heterogeneity among study results (e.g. subgroup analysis, meta-regression). | Page7 |
| 13f | Describe any sensitivity analyses conducted to assess robustness of the synthesized results. | Page7 |
| Reporting bias assessment | 14 | Describe any methods used to assess risk of bias due to missing results in a synthesis (arising from reporting biases). | Page7 |
| Certainty assessment | 15 | Describe any methods used to assess certainty (or confidence) in the body of evidence for an outcome. | Page7 |
| **RESULTS** | | |  |
| Study selection | 16a | Describe the results of the search and selection process, from the number of records identified in the search to the number of studies included in the review, ideally using a flow diagram. | Page8 |
| 16b | Cite studies that might appear to meet the inclusion criteria, but which were excluded, and explain why they were excluded. | Page8 |
| Study characteristics | 17 | Cite each included study and present its characteristics. | Page9 |
| Risk of bias in studies | 18 | Present assessments of risk of bias for each included study. | Page9 |
| Results of individual studies | 19 | For all outcomes, present, for each study: (a) summary statistics for each group (where appropriate) and (b) an effect estimate and its precision (e.g. confidence/credible interval), ideally using structured tables or plots. | Page9 |
| Results of syntheses | 20a | For each synthesis, briefly summarise the characteristics and risk of bias among contributing studies. | Page9-12 |
| 20b | Present results of all statistical syntheses conducted. If meta-analysis was done, present for each the summary estimate and its precision (e.g. confidence/credible interval) and measures of statistical heterogeneity. If comparing groups, describe the direction of the effect. | Page9-12 |
| 20c | Present results of all investigations of possible causes of heterogeneity among study results. | Page9-12 |
| 20d | Present results of all sensitivity analyses conducted to assess the robustness of the synthesized results. | Page9-12 |
| Reporting biases | 21 | Present assessments of risk of bias due to missing results (arising from reporting biases) for each synthesis assessed. | Page10 |
| Certainty of evidence | 22 | Present assessments of certainty (or confidence) in the body of evidence for each outcome assessed. | Page13 |
| **DISCUSSION** | | |  |
| Discussion | 23a | Provide a general interpretation of the results in the context of other evidence. | Page14 |
| 23b | Discuss any limitations of the evidence included in the review. | Page18 |
| 23c | Discuss any limitations of the review processes used. | Page18 |
| 23d | Discuss implications of the results for practice, policy, and future research. | Page17 |
| **OTHER INFORMATION** | | |  |
| Registration and protocol | 24a | Provide registration information for the review, including register name and registration number, or state that the review was not registered. | Page4 |
| 24b | Indicate where the review protocol can be accessed, or state that a protocol was not prepared. | Page4 |
| 24c | Describe and explain any amendments to information provided at registration or in the protocol. | Page4 |
| Support | 25 | Describe sources of financial or non-financial support for the review, and the role of the funders or sponsors in the review. | Page19 |
| Competing interests | 26 | Declare any competing interests of review authors. | Page19 |
| Availability of data, code and other materials | 27 | Report which of the following are publicly available and where they can be found: template data collection forms; data extracted from included studies; data used for all analyses; analytic code; any other materials used in the review. | Page19 |

Supplementary Table 2 Search terms for central concepts of the research aims.

| Sleep | “Sleep*” OR “night waking*” OR “night awakening*” OR “time to fall asleep” OR “time in bed” OR “bed time” OR “wake* time” OR “get* time” OR “nap*” OR “fatigue*” OR “tired*” OR “hypersom*” OR “excessive somnol*” OR “narcolepsy” OR “insomnia” OR “circadian rhythm disorder*” OR “non-24-h circadian rhythm disorder” OR “parasomnia*” OR “confusional arousal” OR “somn*” OR “night* terror*” OR “nightmare*” OR “hypoventilation*” OR “hypopnea*” OR “night bruxism*” |
| --- | --- |
| Myopia | “myopi*” OR “shortsight*” OR “nearsight” OR “refractive error*” |
| Children | “child*” OR “adolescen*” OR “pediatric” OR “pediatric” OR “young people” OR “teen*” OR “youth” |

Supplementary Table 3 Detailed characteristics of studies included in the systematic review of insufficient sleep and the prevalence of myopia.

| **First author, year** | **Region** | **Study design** | **Age (years)** | **Sample size(n)** | **Myopic cases(n)** | **Prevalence of myopia** | **Sex (Male%)** | **Myopia definition  (measure)** | **Sleep duration measurement** | **Regression analysis** | **Sleep duration (h)** | | **Definition of sleep duration** | **Quality** |
| --- | --- | --- | --- | --- | --- | --- | --- | --- | --- | --- | --- | --- | --- | --- |
| **Insufficient** | **Ref** |
| Gong, 2014 | China | CS | 6-18 | 15316 | 8178 | 53.40% | 48.5 | SER ≤−0.75 D (auto-refraction, without cycloplegia) | Self-reported | Multivariate, age, gender, parental myopia, father’s education, reading or writing distance, hours of sports per day, hours spent watching TV or using a computer per day, hours of studying per day | ≤7h | ≥9h | Uncertain | High |
| Zhou, 2015 | China | CS | 9.80±0.44 | 1902 | 588 | 30.91% | 53.1 | SER ≤−0.50 D (auto-refraction, cycloplegia, 1% cyclopentolate) | Parent-reported | Multivariate, age, gender, time spent in near work, time outdoors, CSHQ score | 7-8h | ≥9h | Night time sleep | High |
| Guo, 2016 | China | CS | 6-18 | 59198 | 37603 | 63.52% | 52.3 | Visual acuity < 20/20 a & subjective refraction | Parent-reported | Univariate analysis | Continuous variable | | Uncertain | Medium |
| Jee, 2016 | Korea | CS | 12-19 | 3625 | 2895 | 79.86% | 52.9 | SER ≤−0.50 D (auto-refraction, without cycloplegia) | Self-reported | Multivariate, adjusted for sex, age, height, education level, economic status, physical activity. | <8h | ≥8h | Uncertain | High |
| Xu, 2016 | China | CS | 8-18 | 8030 | 5861 | 72.99% | 49.9 | Visual acuity < 20/20 a subjective refraction | Self-reported | Multivariate, urban/rural, gender and age | <7h | ≥8h | Uncertain | High |
| Zhou, 2016 | China | CS | 6-18 | 57904 | 32253 | 55.70% | 51.3 | Visual acuity < 20/20 a subjective refraction | Self/parent | Multivariate, age, gender, parental myopia, reading or writing distance, hours of sports per day, hours spent watching TV or using a computer per day | <9h | ≥9h | Uncertain | High |
| Qi, 2019 | China | LS | 14-16 | 522 | 141 | 27.01% | 100 | Visual acuity, SER ≤−0.50 D (auto-refraction, cycloplegia, 0.5% tropicamide) | Self-reported | Multivariate, parental myopia, baseline SER, time outdoors, near work time, reading or writing distance, reading/writing for >1h, age at start of primary school | ≤7h | >7h | Uncertain | Medium |
| Cao, 2020 | China | CS | 6-15 | 6164 | 2592 | 42.05% | 50.3 | Visual acuity < 20/20 a SER (TOPCON-RM8900, without cycloplegia) | Self-reported | Multivariate, grade, gender, time spent on homework per day, whether parents are nearsighted | ≤8h | >8h | Uncertain | Medium |
| Liu, 2020 | China | LS | 7.2±0.7 | 5305 | 1177 | 22.19% | 53.2 | SER ≤−0.50 D (auto-refraction, cycloplegia, 0.5% tropicamide) | Parent-reported | Multivariate, area, age, gender, usual bedtime | <9.5h | ≥9.5h | Night time sleep | High |
| Wei, 2020 | China | LS | 5.76-9.27 | 1887 | 523 | 27.72% | 51.9 | SER ≤−0.50 D (auto-refraction, cycloplegia, 1% cyclopentolate) | Parent-reported | Univariate analysis | ≤9.56h | >9.56h | Uncertain | High |
| Xu, 2020 | China | CS | 10-15 | 102883 | 66589 | 64.72% | 0.00% | Visual acuity < 20/20 a subjective refraction | Self-reported | Multivariate, adjusted for age by days, urban–rural location, survey year, and the other two behavioral factors | <7h | ≥9h | Uncertain | High |
| Zhang, 2020 | China | CS | 6-9 | 2623 | 513 | 19.56% | 53.2 | SER ≤−0.50 D (auto-refraction, cycloplegia, tropicamide) | Parent-reported | Multivariate, variables of father’s diopters, mother’s diopters, variables of near work, sleep, and outdoor exposure | Continuous variable | | Uncertain | High |
| Alexis, 2021 | France | LS | 2-5 | 1130 | 230 | 20.35% | 52.6 | Questionnaire of eye glasses prescription made by vision specialist doctor | Parent-reported | Univariate analysis | <10.5h | 10.5h-11h | Night time sleep | High |
| Lai, 2021 | China | LS | 6-18 | 4825 | 2800 | 58.03% | 54.8 | Visual acuity < 20/20 a SER ≤−0.50 D, without cycloplegia | Self-reported | Multivariate, age, gender, parental myopia, reading or writing distance, time outdoors, hours spent watching TV or using a computer per day, hours of studying per day | Based on grade level b | | Uncertain | High |
| Lu, 2021 | China | CS | 9-12 | 556 | 354 | 63.67% | 55.2 | Visual acuity < 20/20 a, SER ≤−0.50 D (auto-refraction, without cycloplegia) | Self-reported | Multivariate, age, grade, gender, change class seats, adjust the height of desks and chairs,  parental myopia | ≤8h | >8h | Uncertain | High |
| Zhang, 2021 | China | CS | 6-17 | 3072 | 1705 | 55.50% | 53.5 | SER ≤−0.50 D (auto-refraction, 0.5% tropicamide) | Self-reported | Sleep duration × family type | Continuous variable | | Uncertain | High |
| Chen, 2022 | China | CS | <18 | 7948 | 4733 | 59.55% | 51.9 | Visual acuity < 20/20 a, SER ≤−0.50 D (auto-refraction, cycloplegia, tropicamide) | Self-reported | Univariate analysis | <7h | 7-9h | Uncertain | High |
| Li, 2022 | Singapore | CS | 8-9 | 572 | 213 | 37.24% | 49.9 | SER ≤−0.50 D (auto-refraction, cycloplegia, 1% cyclopentolate) | Parent-reported | Multivariate, gender, ethnicity, near-work, time outdoors, parental myopia and maternal education | Continuous variable | | Nighttime sleep and naps combined | High |
| Li, 2022 | China | CS | 7-12 | 10700 | 2268 | 21.20% | 53.2 | Questionnaire on whether their children have myopia and specific refractive values | Parent-reported | Multivariate, age, gender, BMI, father and mothers’ education level, per capita income, outdoor time on weekdays/free days, homework time on weekdays/free days, TV time, electronic product exposure | <9h | ≥9h | Uncertain | High |
| Ma, 2022 | China | CS | 6-12 | 913 | 152 | 16.60% | 50.1 | SER ≤−0.5 D (auto-refraction, without cycloplegia) | Self-reported | Multivariate, eye-use behaviors, eye-use environment, physical activities, diet and sleep, hereditary factors, personal factors. Only β reported. | Continuous variable | | Uncertain | Medium |
| Peng, 2022 | China | CS | <18 | 6154 | 4035 | 65.57% | 53.4 | Visual acuity < 20/20 a, SER ≤−0.50 D (auto-refraction, without cycloplegia) | Self-reported | Multivariate, sex, grade, hours of homework per day, number of core subjects per week, time of going to sleep, number of physical activities | <6h | >8h | Uncertain | High |
| Tian, 2022 | China | CS | 6-18 | 1622 | 995 | 61.34% | 47.9 | Visual acuity < 20/20 a, SER ≤−0.50 D (auto-refraction, without cycloplegia) | Self-reported | Univariate analysis | Based on grade level b | | Uncertain | High |
| Wang, 2022 | China | CS | 5-6 | 23930 | 2561 | 10.70% | 52.1 | SER ≤−0.50 D (auto-refraction, 0.5% tropicamide) | Parent-reported | Univariate analysis | <9h | ≥9h | Uncertain | High |
| Wang, 2022 | China | CS | 8-12 | 24318 | 6758 | 27.79% | 51.2 | Visual acuity < 20/20 a, SER ≤−0.50 D (auto-refraction, without cycloplegia) | Parent-reported | Univariate analysis | ≤7h | >9h | Uncertain | High |
| Zhuang, 2022 | China | CS | 12.38±1.78 | 35614 | 24217 | 68.00% | 51.9 | SER ≤−0.50 D (auto-refraction, without cycloplegia) | Self-reported | Multivariate, age, family history, eye exercise, outdoor play hours, study hours, use of mobile devices, daily hours of watching television, using computer, read in the sun, read while lying down | <8h | ≥8h | Uncertain | High |
| Huang, 2023 | China | CS | 6-18 | 1140 | 966 | 84.74% | 48.4 | SER ≤−0.50 D (auto-refraction, cycloplegia, 0.5% tropicamide) | Self/parent | Multivariate, age, gender, parental myopia, outdoor time,  continuous near work duration without breaks | <8h | ≥8h | Uncertain | High |
| Lin, 2023 | China | CS | 13.6±2.6 | 9530 | 7031 | 73.78% | 51.1 | SER ≤−0.50 D (auto-refraction, without cycloplegia) | Self-reported | Multivariate, age, gender, area, and physical activity | <8h | ≥10h | Night time sleep | High |
| Mu, 2023 | China | CS | 7-9 | 7597 | 3943 | 51.90% | 44.6 | Visual acuity < 20/20 a, SER ≤−0.50 D (auto-refraction, without cycloplegia) | Parent-reported | Univariate analysis | <8h | ≥8h | Uncertain | High |
| Shi, 2023 | China | CS | 7-18 | 876 | 329 | 37.56% | 51.9 | SER ≤−0.50 D (auto-refraction, cycloplegia, 1% cyclopentolate) | Self-reported | Univariate analysis | Continuous variable | | Uncertain | High |
| Xu, 2023 | China | CS | 11-18 | 30188 | 15034 | 49.80% | 56 | Questionnaire on type of glasses and the age at which they first started wearing them | Self/parent | Multivariate, age, sex, family income, parental education level, parental  myopia, academic record, and academic workload. | <8h | ≥8h | Night time sleep | High |
| Zhang, 2023 | China | CS | median age 11.9 | 19882 | 14436 | 72.61% | 51 | Visual acuity < 20/20 a, SER ≤−0.50 D (auto-refraction, without cycloplegia) | Self-reported | Univariate analysis | <8h | ≥8h | Uncertain | High |
| Zhao, 2023 | China | CS | 5-13 | 1423 | 462 | 32.47% | 37.1 | Questionnaire on children’s latest vision test results conducted by optometrists | Parent-reported | Univariate analysis | <9h | ≥9h | Night time sleep | High |

Abbreviations: CS = cross-sectional; LS = longitudinal; SER = equivalent spherical refraction.

Notes: a Snellen visual acuity; b Primary school students > 10h, middle school > 9h and high school > 8h as normal.

Supplementary Table 4 Detailed characteristics of studies included in the systematic review of insufficient sleep and refractive parameters.

| **First author,  year** | **Region** | **Study design** | **Age (years)** | **Sample size(n)** | **Sex (Male %)** | **Outcomes and measurements** | **Regression analysis** | **Sleep duration measurement** | **Sleep duration (h)** | | **Definition of sleep duration** | **Quality** |
| --- | --- | --- | --- | --- | --- | --- | --- | --- | --- | --- | --- | --- |
| **Insufficient** | **Ref** |
| Hua,2015 | China | LS | 6-14 | 317 | 47.9 | SER: auto-refraction, 0.5% tropicamide AL: IOL Master | Multivariate, gender, nationality and body mass index | Both | Continuous variable | | Uncertain | Medium |
| Sensaki,2018 | Singapore | LS | 1-3 | 1236 | 50.3 | SER: auto-refraction, 1% cyclopentolate AL: IOL Master | Multivariate, age, sex, ethnicity, maternal education level, parental myopia, height at 36 months, near work and outdoor time | Parent-reported | Continuous variable | | Nighttime sleep and naps combined | Medium |
| Wang, 2020 | China | CS | 66.8 ± 3.4 months | 1327 | 53.2 | Astigmatism was defined as a cylinder magnitude ≤1.0 D (auto-refraction, low-coherent reflectometer) | Multivariate, age of the child, paternal age at child birth, paternal astigmatism, maternal astigmatism, second-hand smoke exposure during pregnancy, and feeding patterns. | Parent-reported | Continuous variable | | Night time sleep | High |
| Wei,2020 | China | LS | 7.09 ± 0.41 | 1887 | 51.9 | SER: auto-refraction, 1% cyclopentolate AL: Lenstar LS900 | Multivariate, age, gender, parental myopia, time outdoors, near work, height, and weight. | Parent-reported | Continuous variable | | Uncertain | High |
| Zhao,2020 | China | CS | 6-12 | 1091 | 46.9 | SER: auto-refraction, 0.5% tropicamide AL, AL/CR, K, CR: IOL Master | Multivariate, age, gender, height, BMI, parental myopia, time spent outdoors, time spent on homework | Parent-reported | Continuous variable | | Uncertain | High |
| Cui,2021 | China | CS | 9.8± 2.5 | 566 | 53.4 | SER: auto-refraction, 0.5% tropicamide AL, AL/CR, CR, ACD: Lenstar LS900 | Multivariate, age, sex, height, weight, parents' education, parents' occupation, family income | Both | ≤7h | >9h | Uncertain | Medium |
| Cai, 2022 | China | CS | 9.60 ± 2.30 | 115 | 57.4 | AL: IOL Master | Univariate analysis, with r reported only | Self-reported | Continuous variable | | Uncertain | Medium |
| Li,2022 | Singapore | CS | 8-9 | 572 | 49.5 | SER: auto-refraction, 1% cyclopentolate AL: IOL Master | Multivariate, gender, ethnicity, near-work, time outdoors, parental myopia and maternal education | Parent-reported | Continuous variable | | Nighttime sleep and naps combined | High |
| Huang,2023 | China | CS | 6-18 | 1140 | 48.4 | SER: auto-refraction, 0.5% tropicamide AL: AL-scan | Multivariate, age, gender, parental myopia, outdoor time,  continuous near work duration without breaks | Both | <8h | >9h | Uncertain | High |

Abbreviations: CS = cross-sectional; LS = longitudinal; SER = equivalent spherical refraction; AL = axial length; CR = radius of corneal curvature; K = corneal curvature; VCD = vitreous chamber depth

Supplementary Table 5 Quality scores of studies included in the systematic review.

|  | Study ID | Study Design | yes | total | Score | Quality |
| --- | --- | --- | --- | --- | --- | --- |
| Myopia | Gong, 2014 | CS | 7 | 9 | 0.78 | High |
|  | Zhou, 2015 | CS | 8 | 9 | 0.89 | High |
|  | Guo, 2016 | CS | 5 | 9 | 0.56 | Medium |
|  | Jee, 2016 | CS | 8 | 9 | 0.89 | High |
|  | Xu, 2016 | CS | 7 | 9 | 0.78 | High |
|  | Zhou, 2016 | CS | 7 | 9 | 0.78 | High |
|  | Qi, 2019 | LS | 9 | 14 | 0.64 | Medium |
|  | Cao, 2020 | CS | 7 | 9 | 0.78 | Medium |
|  | Liu, 2020 | LS | 14 | 14 | 1.00 | High |
|  | Wei, 2020 | LS | 12 | 14 | 0.86 | High |
|  | Xu, 2020 | CS | 8 | 9 | 0.89 | High |
|  | Zhang, 2020 | CS | 8 | 9 | 0.89 | High |
|  | Alexis, 2021 | LS | 13 | 14 | 0.93 | High |
|  | Lai, 2021 | LS | 10 | 14 | 0.71 | High |
|  | Lu, 2021 | CS | 7 | 9 | 0.78 | High |
|  | Zhang, 2021 | CS | 7 | 9 | 0.78 | High |
|  | Chen, 2022 | CS | 7 | 9 | 0.78 | High |
|  | Li, 2022 | CS | 8 | 9 | 0.89 | High |
|  | Li, 2022 | CS | 8 | 9 | 0.89 | High |
|  | Ma, 2022 | CS | 4 | 9 | 0.44 | Medium |
|  | Peng, 2022 | CS | 7 | 9 | 0.78 | High |
|  | Tian, 2022 | CS | 8 | 9 | 0.89 | High |
|  | Wang, 2022 | CS | 8 | 9 | 0.89 | High |
|  | Wang, 2022 | CS | 8 | 9 | 0.89 | High |
|  | Zhuang, 2022 | CS | 8 | 9 | 0.89 | High |
|  | Huang, 2023 | CS | 8 | 9 | 0.89 | High |
|  | Lin, 2023 | CS | 8 | 9 | 0.89 | High |
|  | Mu, 2023 | CS | 8 | 9 | 0.89 | High |
|  | Shi, 2023 | CS | 8 | 9 | 0.89 | High |
|  | Xu, 2023 | CS | 7 | 9 | 0.78 | High |
|  | Zhang, 2023 | CS | 8 | 9 | 0.89 | High |
|  | Zhao, 2023 | CS | 7 | 9 | 0.78 | High |
| Refractive parameters | Hua,2015 | LS | 9 | 14 | 0.64 | Medium |
|  | Sensaki,2018 | LS | 9 | 14 | 0.64 | Medium |
|  | Wang, 2022 | CS | 8 | 9 | 0.89 | High |
|  | Wei,2020 | LS | 12 | 14 | 0.86 | High |
|  | Zhao,2020 | CS | 9 | 9 | 1.00 | High |
|  | Cui,2021 | CS | 6 | 9 | 0.67 | Medium |
|  | Cai, 2022 | CS | 4 | 9 | 0.44 | Medium |
|  | Li,2022 | CS | 8 | 9 | 0.89 | High |
|  | Huang,2023 | CS | 8 | 9 | 0.89 | High |

Abbreviations: CS = cross-sectional; LS = longitudinal

Supplementary Table 6 Meta-regression of factors affecting heterogeneity.

| Variable | Coefficient (95%CI) | *p* value |
| --- | --- | --- |
| **Region** |  |  |
| Reference: developed countries |  |  |
| Developing countries | 1.09(0.14-2.03) | 0.026* |
| **Age** |  |  |
| Reference: children <14 included |  |  |
| All ≥ 14 | 0.49(-0.39-1.38) | 0.262 |
| **Source** |  |  |
| Reference: public based |  |  |
| Hospital based | 1.33(0.19-2.46) | 0.023* |
| **Study design** |  |  |
| Reference: CS |  |  |
| LS | 0.78(-0.27-1.59) | 0.058 |
| **Periods** | -8.13(-194.2-177.9) | 0.930 |
| **Sample size** | 0.44(0.16-0.73) | 0.004** |
| **Sex (Male%)** | 1.14(0.02-2.27) | 0.046* |

Abbreviations: AASM = American academy of sleep medicine; SER = equivalent spherical refraction; CS = cross-sectional; LS = longitudinal.

Notes:

* Statistically significant at p < 0.05.

** Obvious statistically significant at p < 0.01.

a *I*2 statistic = 98%.

b Confidence Interval.

Supplementary Table 7 Subgroup analysis for assessing association between insufficient sleep and prevalence of myopia.

| Subgroups | NO. of comparison | OR/RR (95%CI) | P within group | heterogeneity | |
| --- | --- | --- | --- | --- | --- |
| P heterogeneity | *I*2 |
| **Overall effect** | 27 | 1.59 (1.31-1.95) | <0.01** | <0.01** | 98% |
| **Myopia definition** |  |  |  |  |  |
| Standard myopia measurements | 8 | 1.26 (0.89-1.80) | 0.20 | <0.01** | 93% |
| Else | 19 | 1.75 (1.38-2.22) | <0.01** | <0.01** | 99% |
| **Sleep measurement** |  |  |  |  |  |
| Nighttime sleep (and naps) | 8 | 1.32 (0.85-2.05) | 0.21 | <0.01** | 97% |
| Uncertain | 19 | 1.71 (1.35-2.16) | <0.01** | <0.01** | 99% |
| **Insufficient sleep** |  |  |  |  |  |
| Follow AASM recommendation | 15 | 1.78 (1.36-2.34) | <0.01** | <0.01** | 99% |
| Else | 12 | 1.77 (1.32-2.37) | 0.01* | <0.01** | 99% |
| **Study design** |  |  |  |  |  |
| CS | 23 | 1.59 (1.29-1.97) | <0.01** | <0.01** | 99% |
| LS | 4 | 1.53 (0.60-3.89) | 0.38 | <0.01** | 96% |
| **Region** |  |  |  |  |  |
| Developed countries | 2 | 1.50 (0.99-2.25) | 0.05 | 0.26 | 20% |
| Developing countries | 25 | 1.61 (1.31-1.98) | <0.01** | <0.01** | 99% |
| **Gender (Male%)** |  |  |  |  |  |
| >50% | 15 | 1.76 (1.35-2.29) | <0.01** | <0.01** | 99% |
| <50% | 8 | 1.40 (1.03-1.91) | 0.03* | <0.01** | 99% |
| **Multivariate model adjusted by outdoor time and hours of close eye use** | | | |  |  |
| Not adjusted | 14 | 1.44 (1.07-1.95) | 0.02* | <0.01** | 98% |
| Adjusted | 13 | 1.76 (1.31-2.36) | <0.01** | <0.01** | 99% |

Abbreviations: AASM = American academy of sleep medicine; SER = equivalent spherical refraction; CS = cross-sectional; LS = longitudinal.

Notes:

* Statistically significant at p < 0.05.

** Obvious statistically significant at p < 0.01.
